# Supplementary material for: Stabilization of a mixed iron vanadium based hexagonal tungsten bronze hydroxyfluoride HTB–(Fe0.55V0.45)F2.67(OH)0.33 as a positive electrode for lithium-ion batteries
Source: Royal Society of Chemistry journal article supplement (doi:10.1039/d0dt01310b), 2020-01-01
Supplement: d0dt01310b1.pdf [file d0dt01310b1.pdf]

## SUPPORTING INFORMATION

### **Stabilization of a vanadium based hexagonal tungsten bronze hydroxyfluoride HTB-**

### **(Fe<sub>0.55</sub>V<sub>0.45</sub>)F<sub>2.67</sub>(OH)<sub>0.33</sub> as positive electrode for lithium-ions batteries**

Kévin Lemoine,<sup>a</sup> Romain Moury,<sup>a</sup> Jérôme Lhoste,<sup>a</sup> Annie Hémon-Ribaud,<sup>a</sup> Marc Leblanc,<sup>a</sup> Jean-Marc Grenèche,<sup>a</sup> Jean-Marie Tarascon,<sup>b,c</sup> Vincent Maisonneuve<sup>a\*</sup>

<sup>a</sup> Institut des Molécules et des Matériaux du Mans, UMR 6283 CNRS, Le Mans Université, Avenue Olivier Messiaen, 72085 Le Mans Cedex 9, France

<sup>b</sup> Collège de France, Chaire de Chimie du Solide et de l'Energie, UMR 8260 CNRS, 11 Place Marcelin Berthelot, 75231 Paris, France

<sup>c</sup> Réseau sur le Stockage Electrochimique de l'Energie (RS2E), FR CNRS 3459, 80039 Amiens, France

Kévin Lemoine present address: Department of Chemistry, Faculty of Science, Gakushuin University, 1-5-1 Mejiro, Toshima-ku, Tokyo 171-8588, Japan

**Table S1.** Data collection and structural parameters of  $\text{Fe}_{1.64}\text{V}_{1.36}\text{F}_8(\text{H}_2\text{O})_2$  with the  $C2/m$  space group obtained by powder diffraction.

| Formulation                                 | $\text{Fe}_{1.64}\text{V}_{1.36}\text{F}_8(\text{H}_2\text{O})_2$ | Distances (Fe/V)-F/O (Å)                           |
|---------------------------------------------|-------------------------------------------------------------------|----------------------------------------------------|
| System / Space Group                        | Monoclinic / $C2/m$                                               |                                                    |
| a (Å), b (Å), c (Å),<br>$\beta$ (°)         | 7.5835(3), 7.4814(3), 7.5269(3),<br>119.925(3)                    | 4x Fe(1)-O(1) = 2.14(1)<br>2x Fe(1)-F(3) = 2.04(1) |
| V (Å <sup>3</sup> ), Z                      | 370.1(1), 2                                                       | 2x (Fe(2)/V(1))-F(1) = 1.91(1)                     |
| Wavelength (Å)                              | $\text{CuK}\alpha$                                                | 2x (Fe(2)/V(1))-F(2) = 1.94(1)                     |
| $\rho_{\text{calc.}}$ (g cm <sup>-3</sup> ) | 3.122                                                             | 2x (Fe(2)/V(1))-F(3) = 1.89(1)                     |
| 2 $\theta$ (°)                              | 5 – 150                                                           |                                                    |
| Unique refl.                                | 406                                                               | $\Sigma(\text{Fe}(1)) = 2.05$                      |
| Refined param.                              | 84                                                                | $\Sigma(\text{Fe}(2)/\text{V}(1)) = 3.24$          |
| $R_p / R_{wp}$                              | 0.223 / 0.132                                                     |                                                    |
| $R_B / R_f$                                 | 0.040 / 0.057                                                     |                                                    |
| $\chi^2$                                    | 2.05                                                              |                                                    |

**Table S2.** Atomic coordinates and equivalent ADP of  $\text{Fe}_{1.64}\text{V}_{1.36}\text{F}_8(\text{H}_2\text{O})_2$ .

| Atom                 | Site | x           | y          | z           | occupancy | $B_{\text{eq}}$<br>(Å <sup>2</sup> ) |
|----------------------|------|-------------|------------|-------------|-----------|--------------------------------------|
| Fe <sup>2+</sup> (1) | 2b   | 0           | 1/2        | 0           | 1         | 3.3(1)                               |
| Fe <sup>3+</sup> (2) | 4f   | 1/4         | 1/4        | 1/2         | 0.32      | 1.7(1)                               |
| V <sup>3+</sup> (1)  | 4f   | 1/4         | 1/4        | 1/2         | 0.68      | 1.7(1)                               |
| O(1)                 | 4i   | 0.2088(10)  | 0          | -0.0183(14) | 1         | 3.9(1)                               |
| F(1)                 | 4h   | 0           | 0.2142(10) | 1/2         | 1         | 3.9(1)                               |
| F(2)                 | 4i   | 0.2412 (11) | 0          | 0.4253(10)  | 1         | 3.9(1)                               |
| F(3)                 | 8j   | 0.1008(11)  | 0.3027(5)  | 0.2160(4)   | 1         | 3.9(1)                               |

**Table S4.** Data collection and structural parameters of  $\text{HTB}-(\text{Fe}_{0.55}\text{V}_{0.45})\text{F}_{2.67}(\text{OH})_{0.33}$  with the  $Cmcm$  space group obtained by powder diffraction.

| Formulation                                 | $(\text{Fe}_{0.55}\text{V}_{0.45})\text{F}_{2.67}(\text{OH})_{0.33}$ | Distances (Fe/V)-F/O (Å)                           |
|---------------------------------------------|----------------------------------------------------------------------|----------------------------------------------------|
| System / Space Group                        | Orthorhombic / $Cmcm$                                                |                                                    |
| a (Å), b (Å), c (Å)                         | 7.296(1), 12.614 (1), 7.447(1)                                       |                                                    |
| V (Å <sup>3</sup> ), Z                      | 357.5(1), 6                                                          |                                                    |
| Wavelength (Å)                              | $\text{CoK}\alpha$                                                   | 4x Fe(1)-F(2) = 1.90(1)<br>2x Fe(1)-F(3) = 1.92(1) |
| $\rho_{\text{calc.}}$ (g cm <sup>-3</sup> ) | 3.081                                                                | 2x (Fe(2)/V(2))-F(2)/O(2) = 1.83(2)                |
| 2 $\theta$ (°)                              | 5 – 150                                                              | 2x (Fe(2)/V(2))-F(1) = 2.19(1)                     |
| Unique refl.                                | 283                                                                  | 2x (Fe(2)/V(2))-F(4) = 1.90(1)                     |
| Refined param.                              | 21                                                                   |                                                    |
| $R_p / R_{wp}$                              | 0.523 / 0.265                                                        |                                                    |
| $R_B / R_f$                                 | 0.088 / 0.121                                                        |                                                    |
| $\chi^2$                                    | 1.87                                                                 |                                                    |

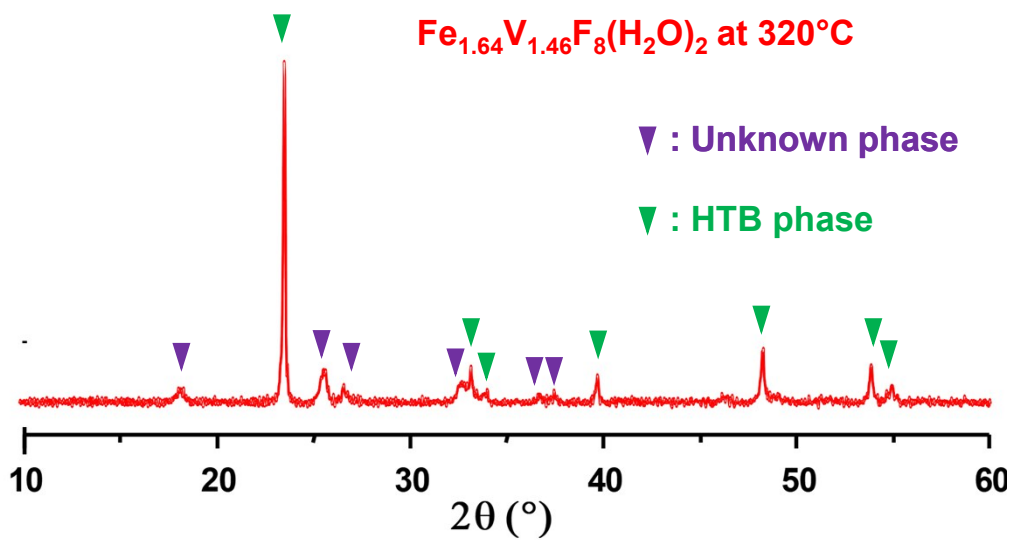

**Figure S1.** Diffraction pattern recorded at 320°C during the *in situ* experiment.

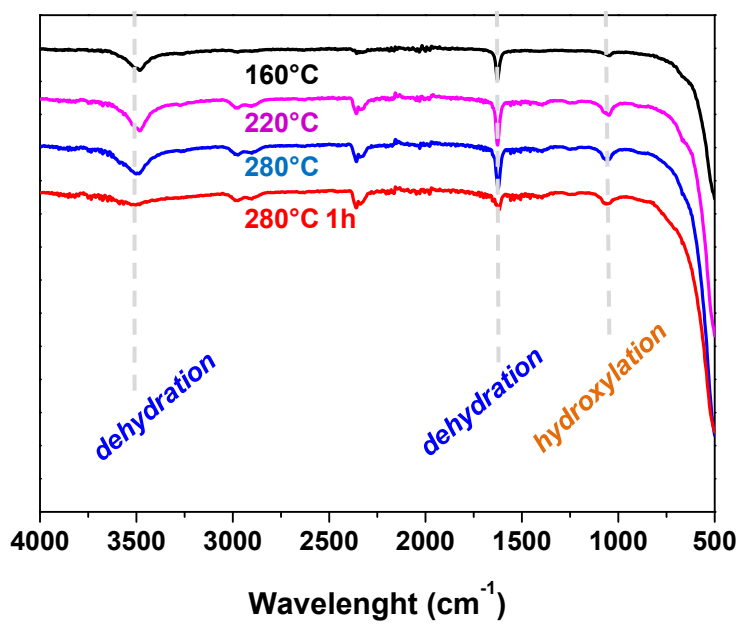

**Figure S2.** Evolution of the IR spectra of  $\text{Fe}_{1.64}\text{V}_{1.36}\text{F}_8(\text{H}_2\text{O})_2$  after treatment under air atmosphere at increasing temperatures.
